# Supplementary material for: The perception and misperception of optical defocus, shading, and shape
Source: eLife journal article supplement (doi:10.7554/elife.48214), 2019-07-12
Supplement: supp [file elife_poa_e48214_Figure_2_figure_supplement_2.docx]

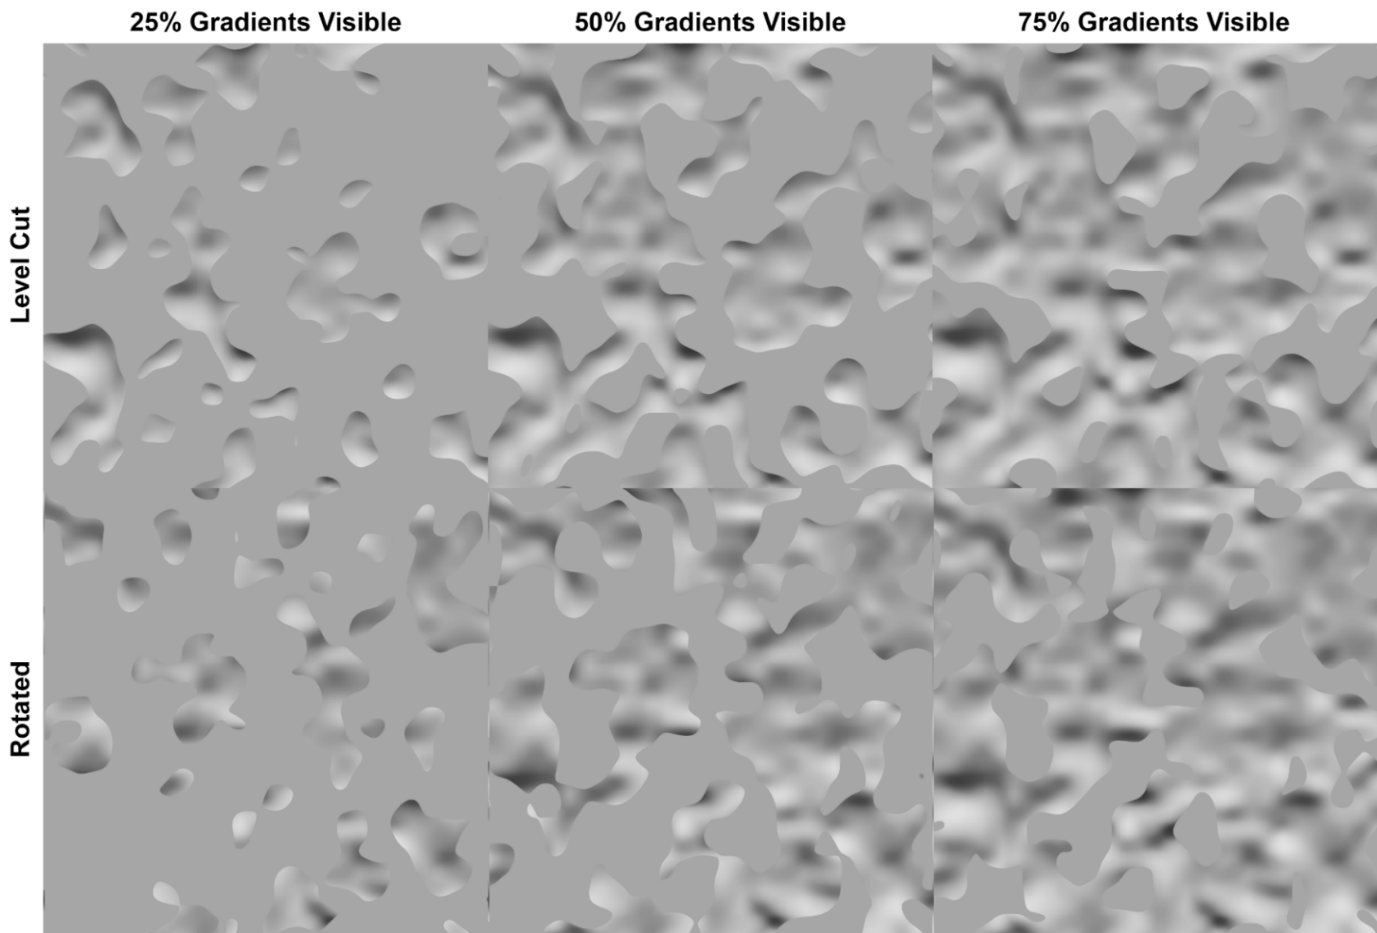


**Figure 2-figure supplement 2.** The ‘bistable’ level cut (top) and rotated (bottom) mask conditions used in Experiment 1. The level cut contours of the masks in the top row are identical to those in the top row of Fig. 2-supplement 1, but the masks now exclude all surface regions at a nearer depth than the level cut contours. The visible gradients are bistable: they can appear as concave dents illuminated from above or convex bumps illuminated from below (or neither). The bottom row depicts rotated versions of these masks that are no longer related to surface geometry. Note that the depth of the level cut now decreases from left to right to produce images with a greater percentage of visible gradients. The top-center image is also shown in Fig. 2C.
